# Supplementary material for: Managing the impact of inter-method bias of prostate specific antigen assays on biopsy referral: the key to move towards precision health in prostate cancer management
Source: publisher site journal article supplement (doi:10.1515/cclm-2022-0874), 2022-11-02

**Supplementary Figures and Tables**

**Supplementary** **Table 1**

P-values of the hypothesis test that the beta coefficient of the regression of the difference from the mean is equal to 1.

| Roche vs Abbot | Roche vs Beckman | Roche vs Siemens |
| --- | --- | --- |
| 1.184352e-17 | 8.089334e-31 | 4.508082e-19 |

**Supplementary Table 2**

Slope and intercept of the Passing-Bablok regression analysis, performed first on each set of measurements and then on the mean values of tPSA.

|  | | **Roche vs Abbot** | **Roche vs Beckman** | **Roche vs Siemens** |
| --- | --- | --- | --- | --- |
| **Intercept** | **Run 1** | -0.036(-0.102, 0.007) | -0.058(-0.128, -0.003) | -0.065(-0.161, 0.004) |
| **Slope** |  | 0.998(0.983, 1.014) | 0.826(0.804, 0.852) | 0.874(0.856, 0.894) |
| **Intercept** | **Run 2** | -0.038(-0.093, 0.023) | -0.104(-0.191, -0.01) | -0.088(-0.149, -0.016) |
| **Slope** |  | 0.95(0.936, 0.969) | 0.812(0.791, 0.835) | 0.856(0.835, 0.874) |
| **Intercept** | **Mean values of tPSA** | -0.033(-0.098, 0.026) | -0.08(-0.144, -0.004) | -0.059(-0.138, -0.014) |
| **Slope** |  | 0.974(0.959, 0.988) | 0.818(0.797, 0.838) | 0.863(0.849, 0.88) |

**Supplementary Figure 1.**

Scatter plots comparing the first set with the second run of tPSA measurements for each assay


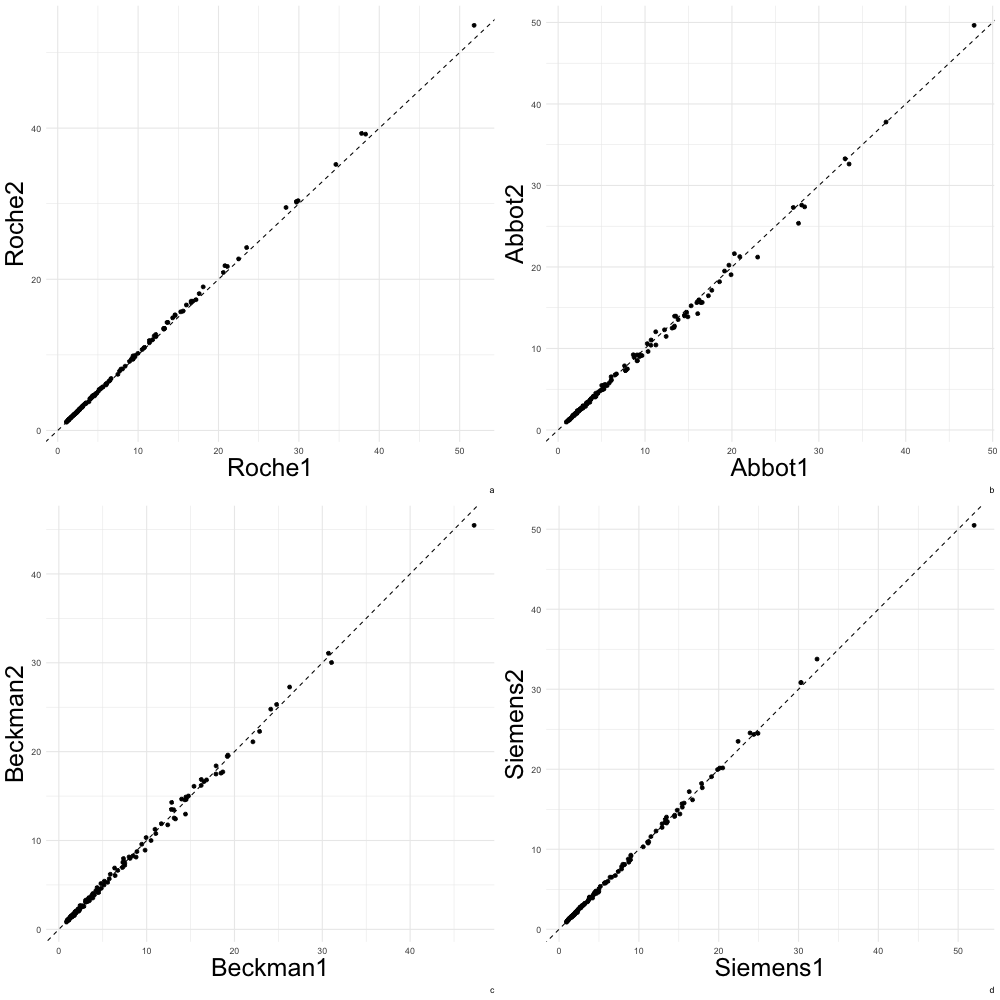


**Supplementary Figure 2.**

Scatter plots comparing the first set with the second run of fPSA measurements for each assay


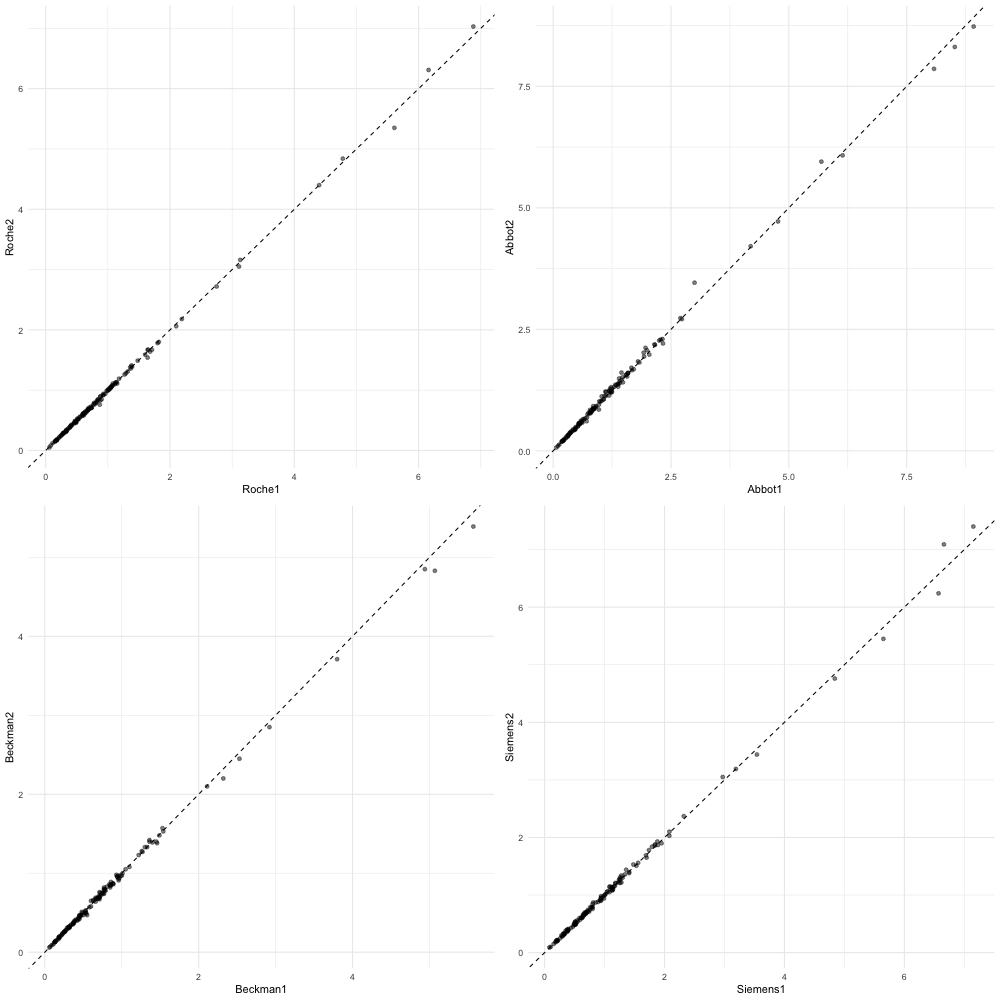

Supplement: Supplementary file 1 [file j_cclm-2022-0874_suppl.docx]
